# Supplementary material for: Genetic diversity of Plasmodium vivax and Plasmodium falciparum lactate dehydrogenases in Myanmar isolates
Source: Malar J. 2020 Feb 4;19:60. doi: 10.1186/s12936-020-3134-y (PMC7001217; doi:10.1186/s12936-020-3134-y)
Supplement: Supplementary file 6 — Additional file 6: Table S4. Potential changes of in the stability of PvLDH caused by 36 mutations using three different predictors. [file 12936_2020_3134_MOESM6_ESM.xlsx]

## Sheet: Table S1
Table S4. Potential stability changes of 36 mutations of PvLDH using three different predictors
			SDM ver. 2		CUPSAT		MAESTROweb
No.	PvLDH mutant	RMSD (from wild-type)	ΔΔGpred 1	Stability	ΔΔGpred 1	Stability	ΔΔGpred 2	Stability
1	V18L	0.001	0.68	-	0.43	-	0.09	-
2	M19R	0.011	-2.38	Destabilising	0.67	-	-	-
3	A20T	0.008	-2.43	Destabilising	3.65	Stabilising	0.92	Destabilising
4	G29W	0.036	-2.17	Destabilising	-0.96	Destabilising	-0.58	-
	G29R	0.02	-2.26	Destabilising	0.92	Stabilising	-	-
5	V37A	0.008	0.33	-	1.13	Stabilising	-	-
6	T48M	0.002	0.21	-	2.97	Stabilising	-0.07	-
7	T62A	0.005	-0.5	-	0.42	-	0.01	-
8	Y67C	0.009	-0.14	-	0.1	-	0.66	-
9	D69N	0.005	0.57	-	0.23	-	-	-
10	V76A	0.003	-2.85	Destabilising	2.91	Stabilising	1.12	Destabilising
11	V78A	0.017	-2.71	Destabilising	2.55	Stabilising	1.06	Destabilising
12	G81E	0.059	-2.04	Destabilising	3.05	Stabilising	-0.13	-
13	S89G	0.004	0.03	-	2.31	Stabilising	-	-
14	D90V	0.011	0.72	-	0.09	-	-	-
	D90N	0.008	-0.35	-	0.1	-	-	-
15	I105F	0.001	-0.3	-	-1.36	Destabilising	0.8	-
16	K114M	0.001	-0.05	-	0.65	-	-0.19	-
17	C117R	0.039	-1.12	Destabilising	1.23	Stabilising	1.47	Destabilising
18	A120T	0.004	-1.75	Destabilising	1.15	Stabilising	0.01	-
19	V125F	0.009	-0.98	-	-0.16	-	-0.51	-
20	V133A	0.003	-0.58	-	-0.44	-	1.23	Destabilising
21	L136P	0.02	-4.41	Destabilising	15.4	Stabilising	-	-
22	K160I	0.002	0.19	-	1.46	Stabilising	-0.16	-
23	G180D	0.046	-3.44	Destabilising	3.16	Stabilising	0.15	-
24	K185R	0.013	0.09	-	-0.73	-	-	-
25	M186I	0.004	-0.19	-	-1.38	Destabilising	0.41	-
26	V195I	0.01	-0.57	-	0.63	-	-0.53	-
27	E212G	0.006	-1.63	Destabilising	1.85	Stabilising	-	-
28	L226S	0.003	-1.41	Destabilising	5.61	Stabilising	-	-
29	Y250H	0.002	-0.97	-	3.55	Stabilising	-	-
30	K252E	0.004	0.3	-	0.97	Stabilising	-0.13	-
31	I273T	0.004	-3.29	Destabilising	2.19	Stabilising	-	-
32	T277I	0.005	1.31	Stabilising	-3.66	Destabilising	-1.93	Stabilising
33	T300A	0.006	2.06	Stabilising	0.9	Stabilising	-0.01	-
	T300I	0.003	1.51	Stabilising	-0.48	-	0.04	-
34	K301E	0.004	0.11	-	0.77	-	-0.08	-
	K301M	0.005	-0.1	-	2.01	Stabilising	-0.04	-
35	K310S	0.003	-0.77	-	0.87	-	-	-
36	M312K	0.008	-1.4	Destabilising	-2.21	Destabilising	-	-
1 ΔΔGpred (kcal/mol) < 0 indicates a destabilising mutation with the |cut-off| ≥ 1 for SDM ver. 2 and CUPSAT. 2 ΔΔGpred (kcal/mol) > 0 indicates a destabilising mutation with the |cut-off| ≥ 1 and c_pred ≥ 0.85 for MAESTEROweb. Cyan cells mean point mutations that is located at the essential residue. Yellow cells mean point mutations that are found in both PvLDH and PfLDH.
